# Supplementary material
Source: PubMed Central journal article supplement (PMC9806571)
Supplement: kiac463_supplementary_data.pdf [file kiac463_supplementary_data.pdf]

## Supplemental Data

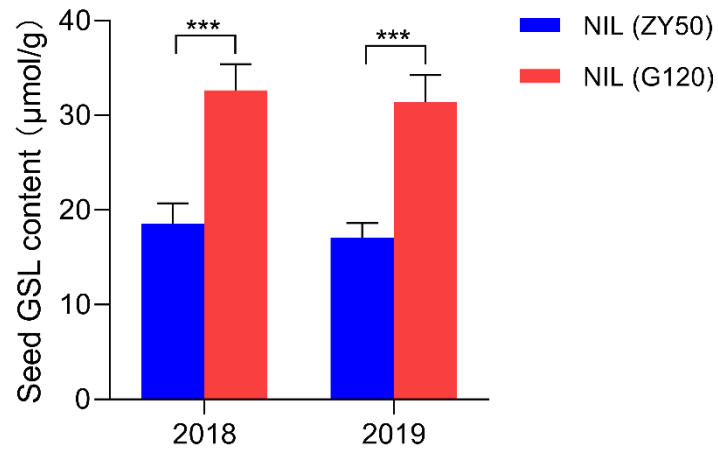

**Supplementary Figure S1. Comparison of seed GSL content between NIL(ZY50) and NIL(G120).** A two-tailed Student's *t*-test between NIL(ZY50) and NIL(G120) was used to calculate the *P* value. The data represent the mean  $\pm$  SD ( $n \geq 10$ ), \*\*\* $P < 0.001$ . 2018 and 2019 represents plants in 2017-2018 and 2018-2019 growing season, respectively. GSL, glucosinolate; NIL, near-isogenic lines.

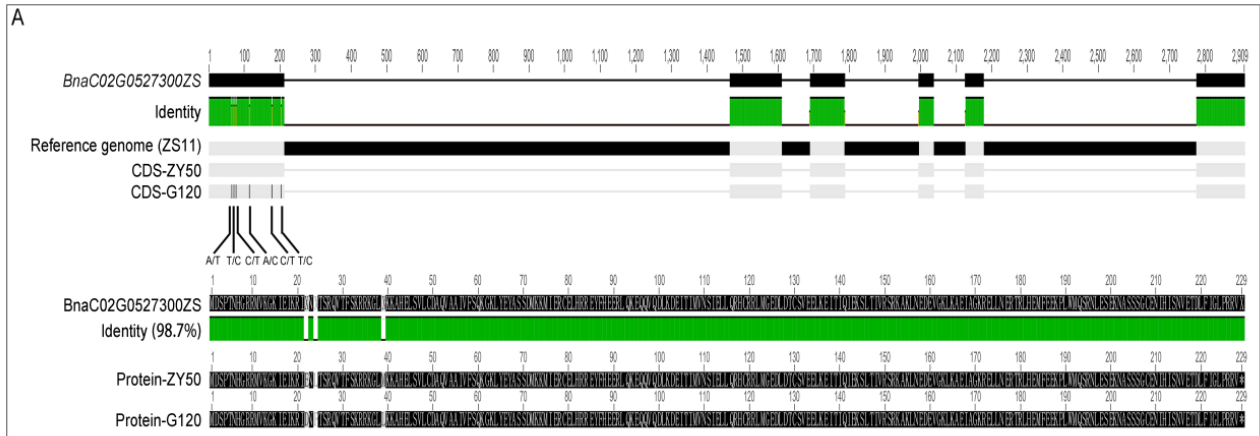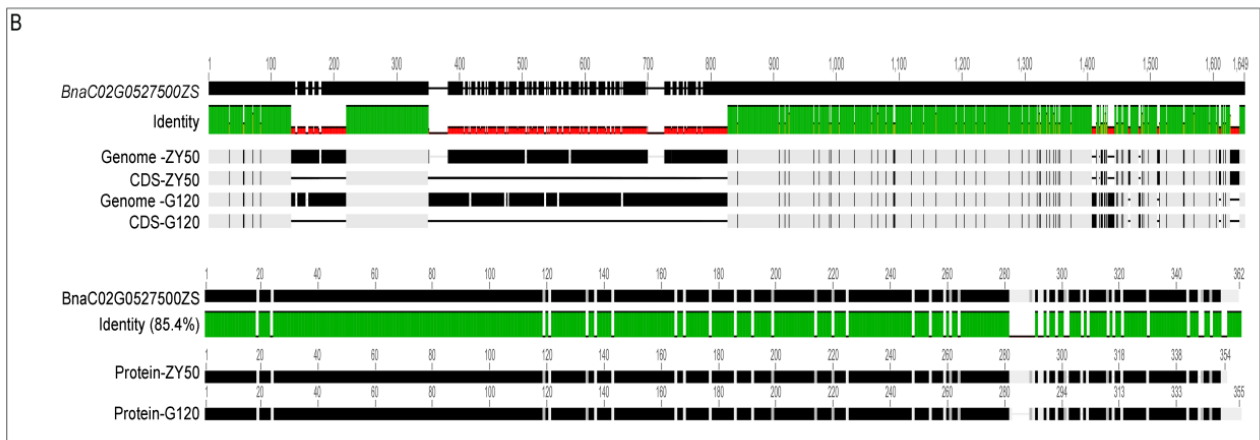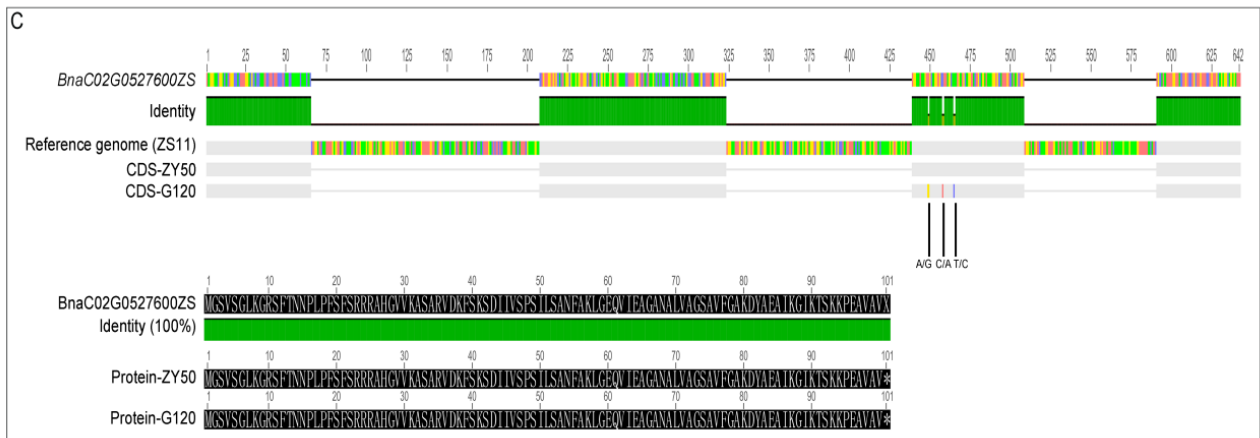

**Supplementary Figure S2. Comparison of coding sequences and amino acid sequences of candidate genes between parental lines.** (A – C) Comparison of coding sequences and amino acid sequences of *BnaC02G0527300ZS*, *BnaC02G0527500ZS* and *BnaC02G0527600ZS*, respectively, between parental lines.

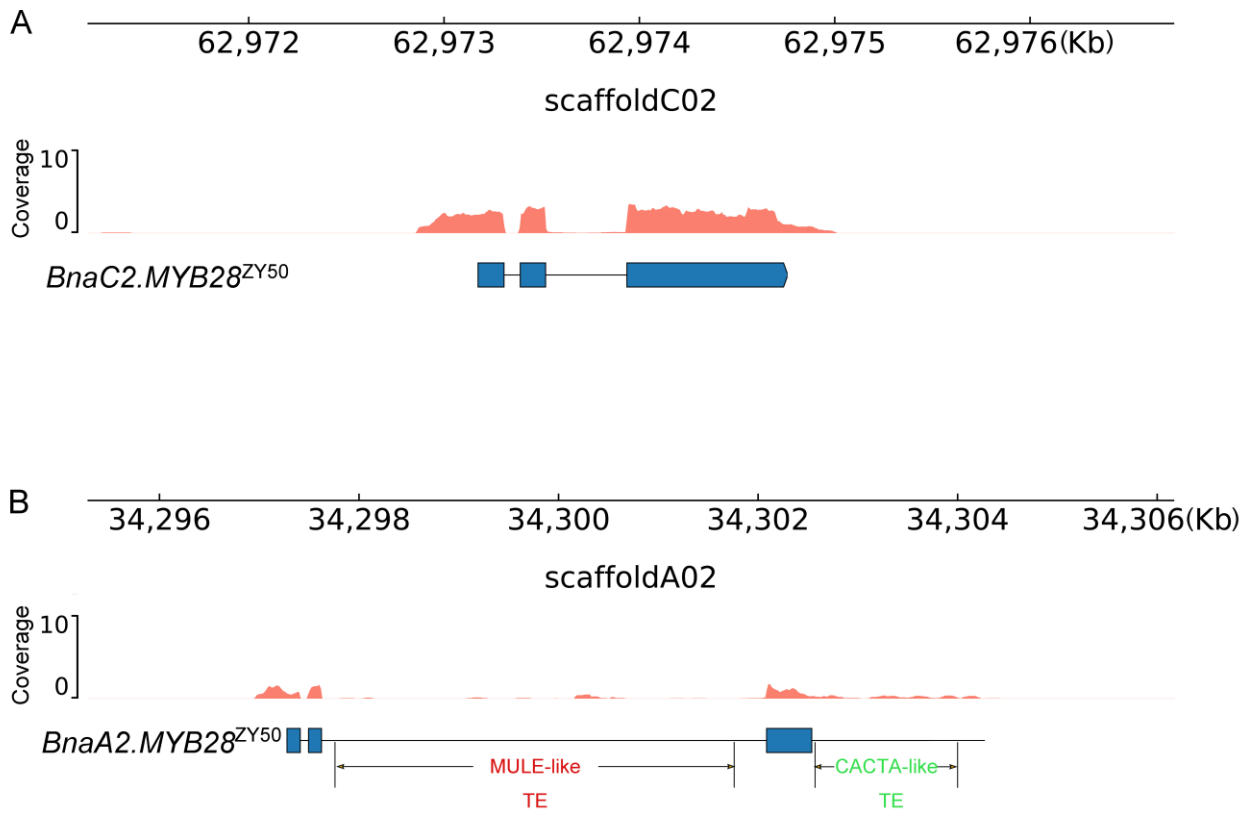

**Supplementary Figure S3. Integrative genomics viewer (IGV) displays the transcripts of *BnaC2.MYB28<sup>ZY50</sup>* and *BnaA2.MYB28<sup>ZY50</sup>*. (A) Part of the alignment tracks of RNA-seq reads in the region of *BnaC2.MYB28*. (B) Part of the alignment tracks of RNA-seq reads in the region of *BnaA2.MYB28*. Kb, kilobase.**

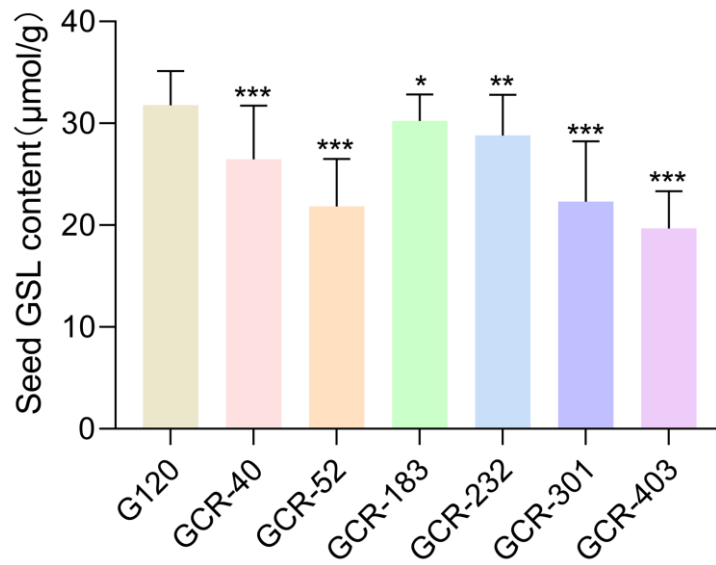

**Supplementary Figure S4. SGC of *BnaC2.MYB28*<sup>G120</sup>-sgRNA plants in the T<sub>1</sub> generation.** A two-tailed Student's *t* test between G120 and *BnaC2.MYB28*<sup>G120</sup>-sgRNA plants was used to calculate the *P* value. The data represent the means  $\pm$  SD ( $n \geq 8$ ); asterisks indicate significant differences (*t*-test; \**P* < 0.05, \*\**P* < 0.01, \*\*\**P* < 0.001). GSL, glucosinolate.

*BnaC2.MYB28<sup>G120</sup>*-Promoter : GCATATTGAATTATGCAGTATC AACTATATATTTATATCTTGGATGATATATATATAACATGAAAAATAAGCCATACA : 80  
*BnaC2.MYB28<sup>ZY50</sup>*-Promoter : GCATATTGAATTATGCAGTATCGACTATATATTTATATCTTGG-----ATATATAT-----ATAAGCCATACA : 63  
GCATATTGAATTATGCAGTATC ACTATATATTTATATCTTGG ATATATAT ATAAGCCATACA

*BnaC2.MYB28<sup>G120</sup>*-Promoter : ATTATGTTTTGCAGTTTTTACAAAAATTTGGTTT TGGGTAATCAAATCATCTTA TTTTTCATGATATCATAAGAAT : 160  
*BnaC2.MYB28<sup>ZY50</sup>*-Promoter : ATTATGTTTTG-----ACAAAAATTTGGTTCTGGGTAATCAAATCATCTTA TTTTTCATGATATCATAAGAAT : 134  
ATTATGTTTTG ACAAAAATTTGGTT TGGGTAATCAAATCATCTTA TTTTTCATGATATCATAAGAAT

*BnaC2.MYB28<sup>G120</sup>*-Promoter : AACACCTACTATATCATTTTAATATAAACGATATATGCATAGTACTTTTATTATAGCATGTTAAGTTAATTATCTA : 240  
*BnaC2.MYB28<sup>ZY50</sup>*-Promoter : AACACCTAC--TATCATTTTAATATAAACGATATGTTGCATAGTACTTT----- : 182  
AAC ACCTAC TATCATTTTAATATAAACGATAT T GCATAGTACTTT

*BnaC2.MYB28<sup>G120</sup>*-Promoter : TTTATTAGTACTGATGTACCATAAAATACCTGGTAGTTAATTGAATATATAATTATATTACTCATTCTGGGTCACCATC : 320  
*BnaC2.MYB28<sup>ZY50</sup>*-Promoter : ----- : -

*BnaC2.MYB28<sup>G120</sup>*-Promoter : AACTAGCAAGTAACACTATGAAATTTATCTTGTTCGATTTCTTTTCTTTTCTTTTAAATTAATCATTAAAGC : 400  
*BnaC2.MYB28<sup>ZY50</sup>*-Promoter : ----- : -

*BnaC2.MYB28<sup>G120</sup>*-Promoter : ATTAACCTCAACCTTAAACATGATATTTTTCGTGATGTTGAGTTAGTAATTTTATAGAAGTAATAACTTAAATGCAATT : 480  
*BnaC2.MYB28<sup>ZY50</sup>*-Promoter : ----- : -

*BnaC2.MYB28<sup>G120</sup>*-Promoter : CAATCATAACACATAATAACTCAAATTTAAATCAAATAATTTAAATTAATACATGAGTGGTCATTTTGGAGTTACAGCC : 560  
*BnaC2.MYB28<sup>ZY50</sup>*-Promoter : ----- : -

*BnaC2.MYB28<sup>G120</sup>*-Promoter : ATAAATCAAACATAAAACTCTAACTTAGTCCACCAATCAAAGCTTAAACCGAAATTTAAACATACATTAATACTGCA : 640  
*BnaC2.MYB28<sup>ZY50</sup>*-Promoter : ----- : -

*BnaC2.MYB28<sup>G120</sup>*-Promoter : CGTCATTAGTGTAAATCCTCTTTTGTGCTAGAAATGCTTAAAATAAATATGTATAGCAAAATGTAGTAATATATACA : 720  
*BnaC2.MYB28<sup>ZY50</sup>*-Promoter : --TCATTAGTGTAAATCCTCTTTTGTGCTAGAAATGCTTAAAATAAATATGTATAGCAAAATGTAGTAATATATACA : 260  
TCATTAGTGTAAATCCTCTTTTGTGCTAGAAATGCTT AAAATAAATATGTATAGCAAAATGTAGTAATATATACA

*BnaC2.MYB28<sup>G120</sup>*-Promoter : GCATCAAAATTGCAAAATATTTTCATGTTAGACAAATAATTGCGAGCTAGTTAAACAAATGATCTATTTAAATAATTAAT : 800  
*BnaC2.MYB28<sup>ZY50</sup>*-Promoter : GCATCAAAATTGCAAAATATTTTCATGTTAGACAAATAATTGCGAGCTAGTTAAACAAATGATCTATTTAAATAATTAAT : 340  
GCATCAA TTGCAAAATAT TTC GTTTAGA AATAATTGCGAGCTAGTTAAACAAATGATCTATTTAAATAATTAAT

*BnaC2.MYB28<sup>G120</sup>*-Promoter : AATTTCGCGTACCAAAATATCTATCATAATCAACATTGTGAGTATGTACGTGTATATATAGAAGAGAATAGCTCTAAG : 880  
*BnaC2.MYB28<sup>ZY50</sup>*-Promoter : AATTTCGCGTACCAAAATATCTATCATAATCAACATTGTGAGTATGTACGTGTATATATAGAAGAGAATAGCTCTAAG : 420  
AATTTCGCGTACCAAAATATCTATCATAATCAACATTGT AG ATGTACGTGTATATATAGAAGAGAATAGCTCT TAAG

*BnaC2.MYB28<sup>G120</sup>*-Promoter : CTCACCACCATCACACAATTCATTGCTCTTCTTCAAGTTTCTTGTAGTCTATCTTATAGTGTATAAAAAATACATATA : 960  
*BnaC2.MYB28<sup>ZY50</sup>*-Promoter : CTCACCACCATCACACAATTCATTGCTCTTCTTCAAGTTTCTTGTAGTCTATCTTATAGTGTATAAAAAATAC----- : 495  
CTCACCACCATCACACAATTCATTGCTCTTCTTCAAGTTTCT TAGTCT ATCTTATAGTGTATAAAAAATAC

*BnaC2.MYB28<sup>G120</sup>*-Promoter : ATATTTCAAGGATATATAGAAAGCAAAAACTCAAAGTCTACTTGAAAAACATGAAAAACACCTAGCAGCTCTGTGGGTAAG : 1040  
*BnaC2.MYB28<sup>ZY50</sup>*-Promoter : ATATTTCAAGGATATATAGAAAGCAAAAACTCAAAGTCTACTTGAAAAACATGAAAAACACCTAGCAGCTCTGTGGGTAAG : 575  
ATATTTCAAGGATATATAGAA GCAAAAA TCAAAGTCTACTTGAAAAACATGAAAAACACCTAGCAGCTCTGTGGG AAG

*BnaC2.MYB28<sup>G120</sup>*-Promoter : ACCCAAGAGCGCTTCTCGATTAGTCTCATATTCAGATGTATCAGAGTTCTCATTAACAGATCTATTTCTTCTTACCTTT : 1120  
*BnaC2.MYB28<sup>ZY50</sup>*-Promoter : ACCCAAGAGCGCTTCTCGATTAGTCTCATATTCAGATGTATCAGAGTTCTCATTAACAGATCTATTTCTTCTTACCTTT : 655  
ACCCAAGAGCGCTTCTCGATTAGTCTCATATTCAGATGTATCAGAGTTCTCATTAACAGATCTATTTCTTCTTACCTTT

*BnaC2.MYB28<sup>G120</sup>*-Promoter : TTAGAAATTTCTTCTGATTTTAGTTTCCFCAAGTATATTTTCTCAATATAGTATTTCCCTTGGTATTGTTTGAACC : 1200  
*BnaC2.MYB28<sup>ZY50</sup>*-Promoter : TTAGAAATTTCTTCTGATTTTAGTTTCC-----CAATATAGTATTTCCCTTGGTATTGTTTGAACC : 719  
TTAGAA ATTTCTTCTGATTTTAGTTTCC CAATATAGTATTTCCCTTGGT ATTGTTTGAACC

*BnaC2.MYB28<sup>G120</sup>*-Promoter : TTTACACATTAGTGTTCATATATATATCGGAGAAA : 1238  
*BnaC2.MYB28<sup>ZY50</sup>*-Promoter : TTTACACATTAGTGTTCATATATATATCGGAGAAA : 758  
TTT ACACATTAGTGTTCAT TATATATATCG GAGAAA

**Supplementary Figure S5. Comparison of the promoter sequences of *BnaC2.MYB28* between the parental lines.**

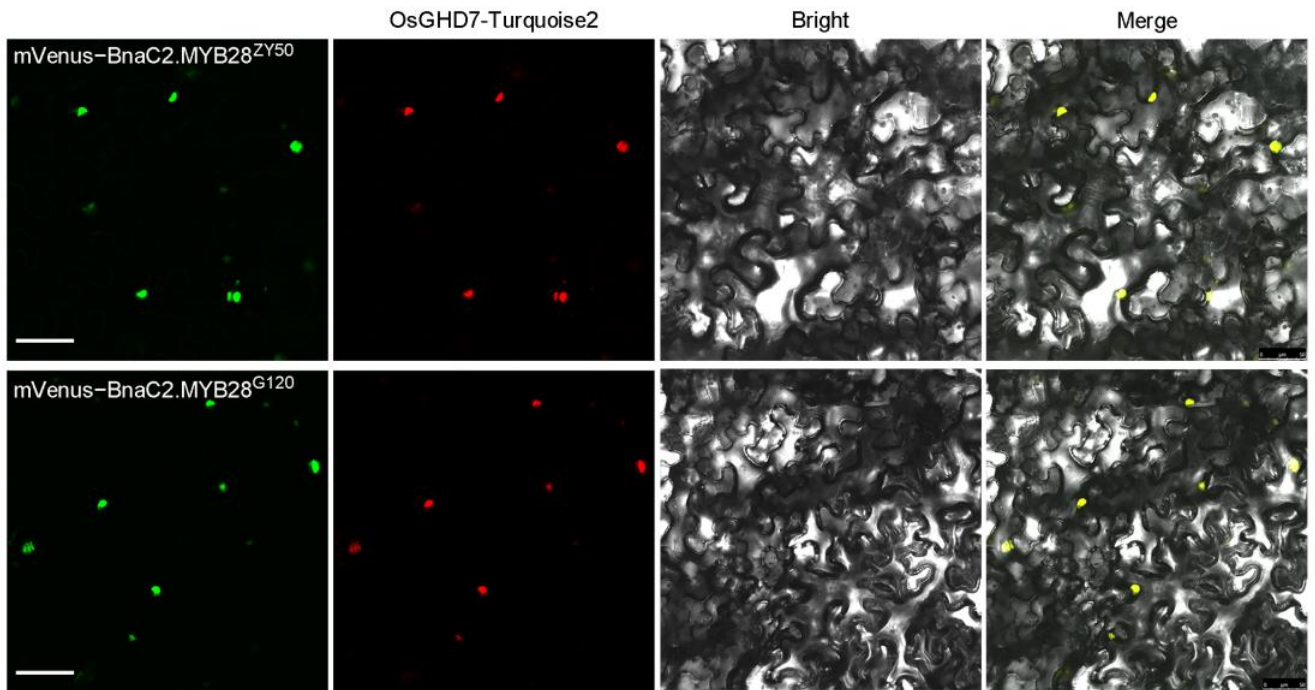

**Supplementary Figure S6. Subcellular localization of BnaC2.MYB28 in *Nicotiana benthamiana* leaves.** The nuclear protein OsGHD7 fused with Turquoise2 was used as a nuclear marker. Bars = 50  $\mu$ m.

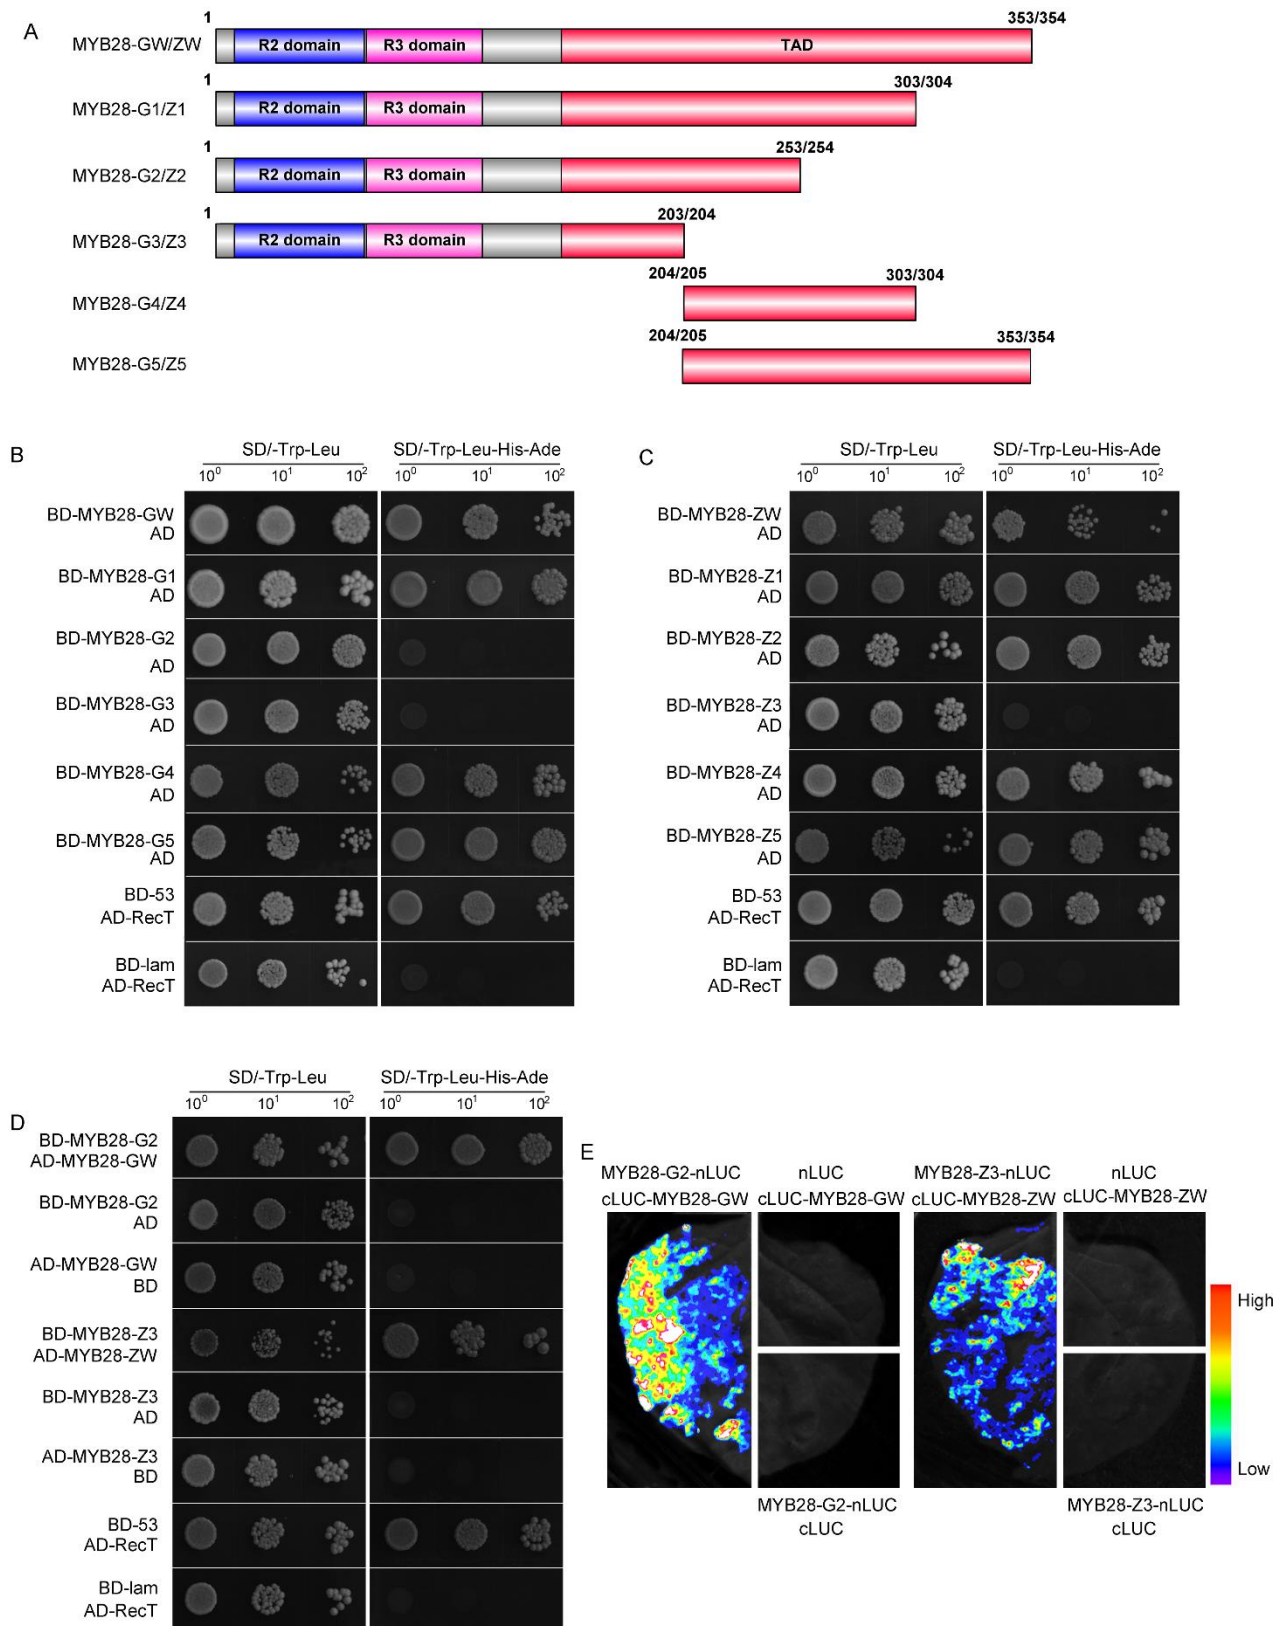

**Supplementary Figure S7. Functional regions of BnaC2.MYB28.** (A) Schematic diagram showing the various fragments of BnaC2.MYB28. MYB28-GW and MYB28-ZW indicate the whole length of BnaC2.MYB28<sup>G120</sup> and BnaC2.MYB28<sup>ZY50</sup> protein, respectively. Transcriptional self-activation test of BnaC2.MYB28<sup>G120</sup> (B) and BnaC2.MYB28<sup>ZY50</sup> (C) in yeast-two-hybrid assays. BnaC2.MYB28 forms

homodimers in yeast-two-hybrid (D) and SLC analysis (E). BD-53/AD-RecT was the positive control, and BD-Lam/AD-RecT was the negative control. AD, pGADT7/activation domain; BD, pGBKT7/binding domain; Ade, adenine; His, histidine; Lam, human lamin C; Leu, leucine; RecT, recombination of the SV40 large T antigen; SD, synthetic defined medium; Trp, tryptophan.



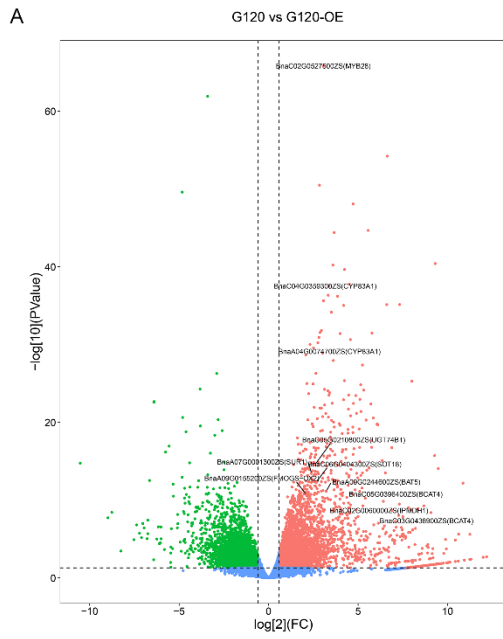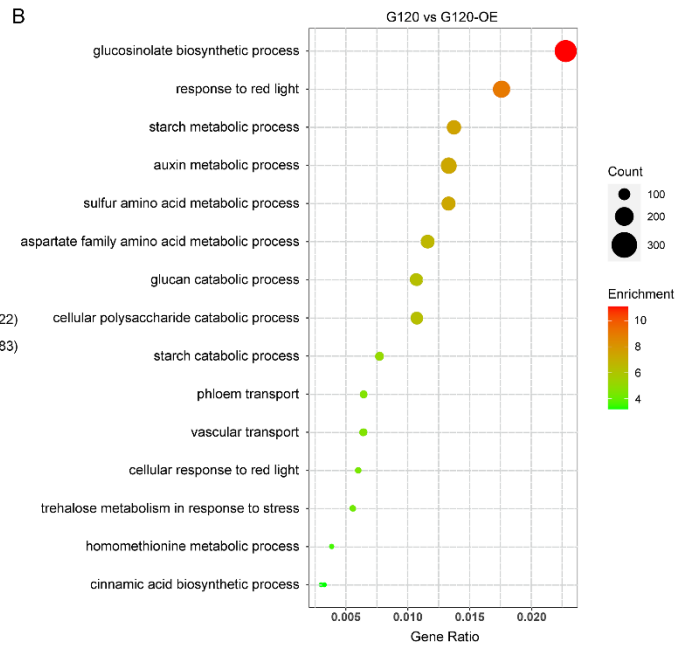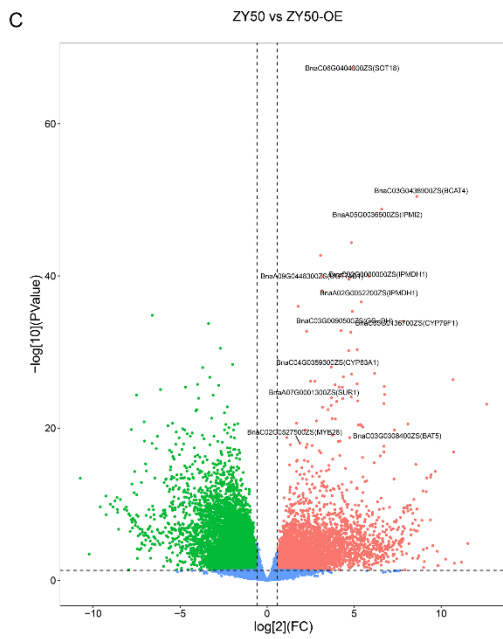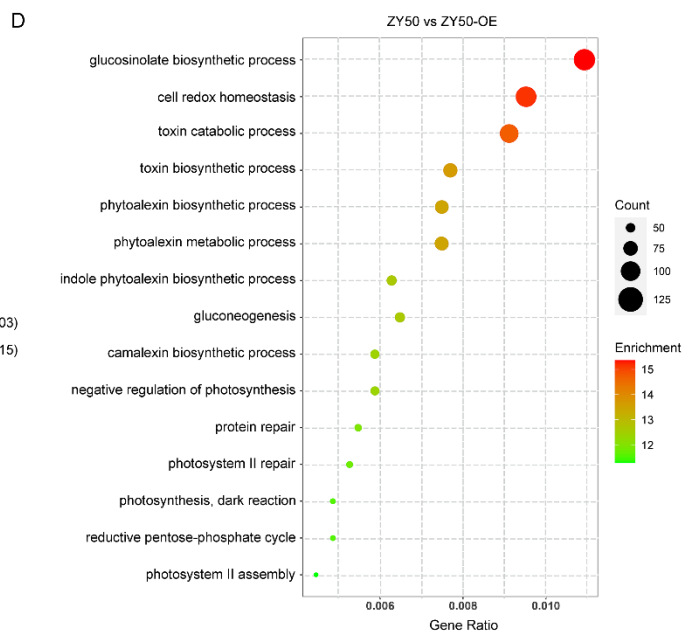

**Supplementary Figure S8. RNA-seq analysis between parental lines and *BnaC2.MYB28* overexpressing lines.** (A) Volcano plot of gene expression between G120 and its *BnaC2.MYB28* overexpressing line G120-OE (fold change (FC)  $\geq 2$ ;  $P$  value  $< 0.05$ ). (B) GO analysis of differentially expressed genes between G120 and G120-OE. (C) Volcano plot of gene expression between ZY50 and its *BnaC2.MYB28* overexpressing line ZY50-OE (fold change (FC)  $\geq 2$ ;  $P$  value  $< 0.05$ ). (D) GO analysis of differentially expressed genes between ZY50 and ZY50-OE.

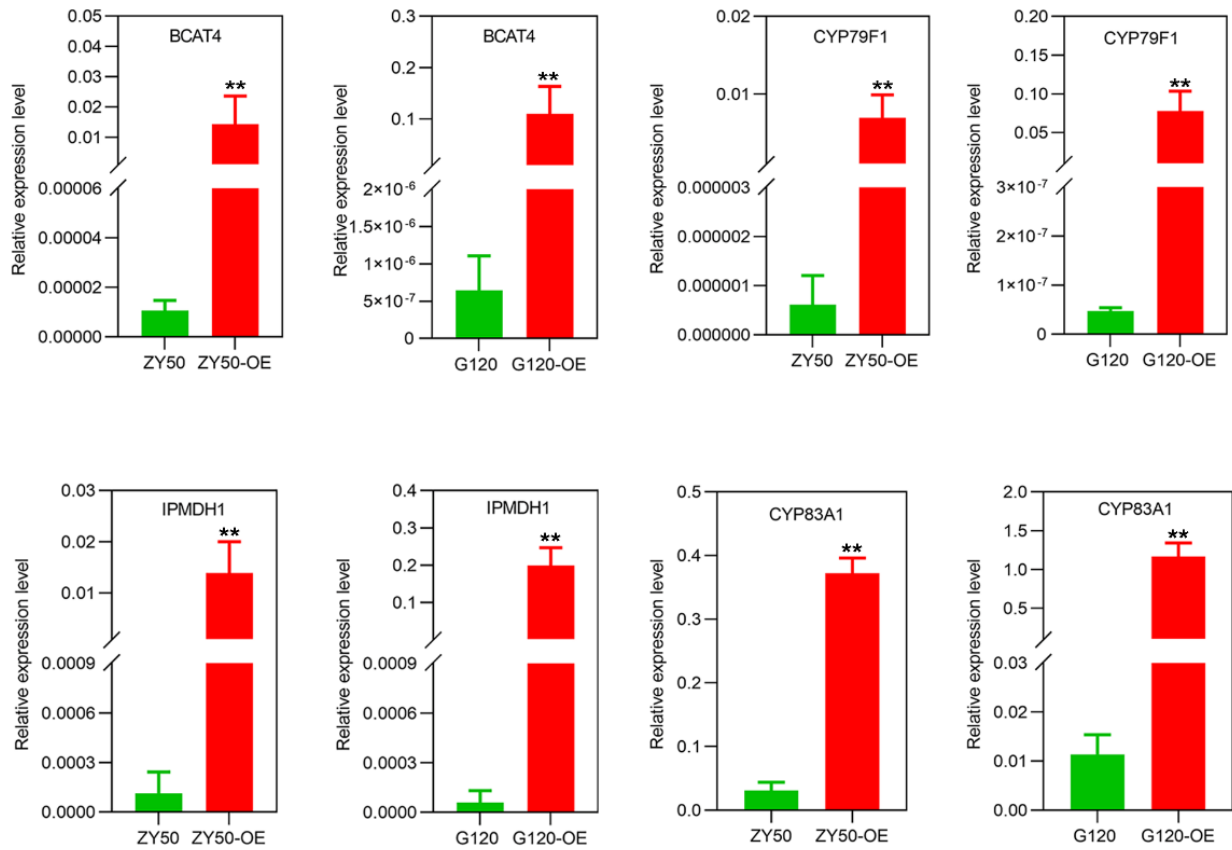

**Supplementary Figure S9. RT-qPCR confirmation of the differentially expressed genes involved in GSL biosynthesis obtained by RNA-seq.** Error bars represent standard errors from three independent RNA samples. A two-tailed Student's *t*-test was used to generate the *P* values.  $**P < 0.01$ .

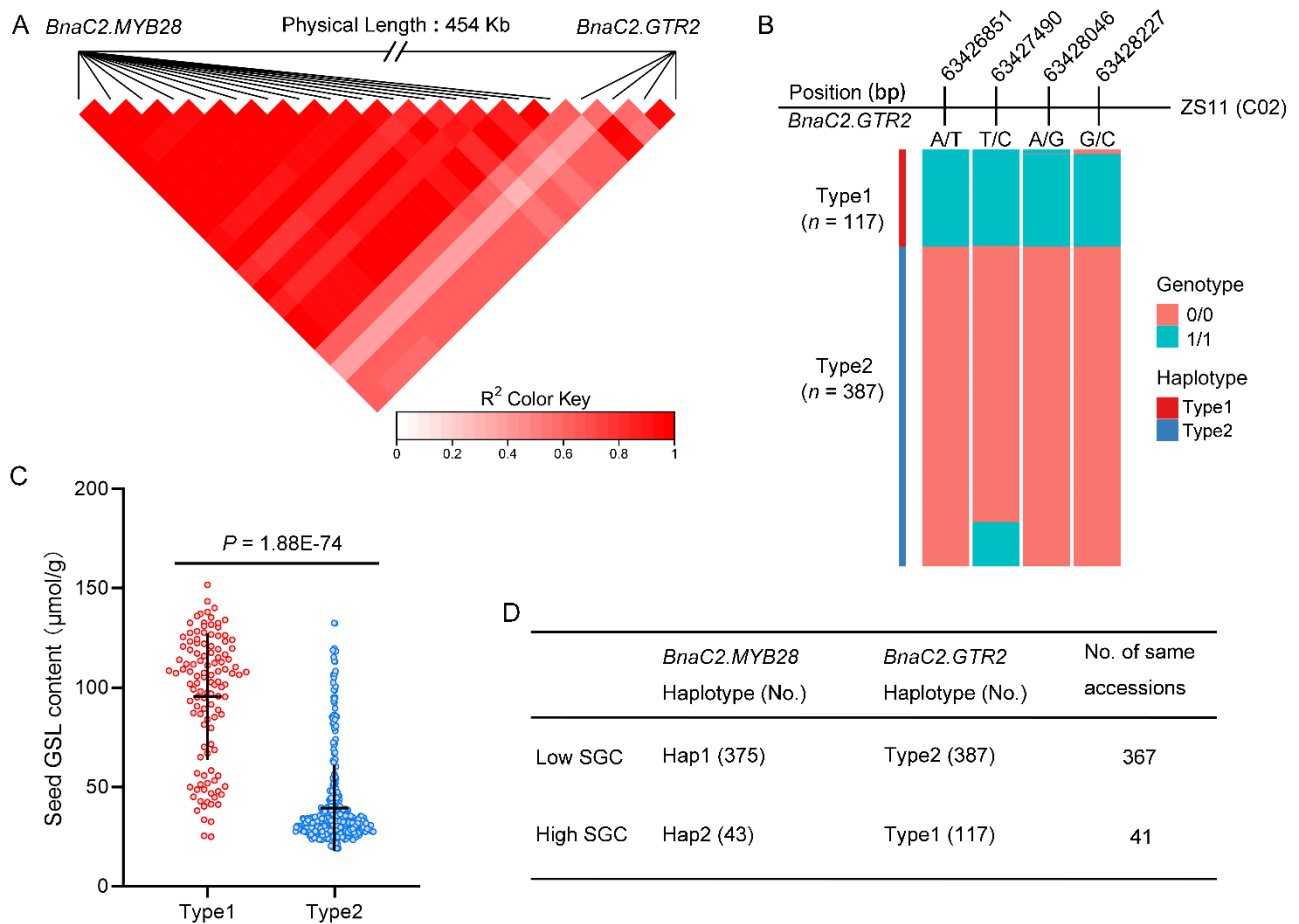

**Supplementary Figure S10. Co-selection analysis of *BnaC2.MYB28* and *BnaC2.GTR2* in natural population.** (A) LD analysis between *BnaC2.MYB28* and *BnaC2.GTR2*. Kb, kilobase. (B) Two major haplotypes were identified in the *BnaC2.GTR2* gene regions. bp, base pair. (C) SGC of the two haplotypes. The horizontal and vertical lines represent the mean value and standard deviation, respectively. Each colored dot represents an individual plant. Data are shown as mean  $\pm$  SD ( $n \geq 117$ ). A two-tailed Student's *t*-test was used to generate the *P* values. (D) Accession statistics of *BnaC2.MYB28* and *BnaC2.GTR2* haplotypes.

**Table S1. SGC in *BnaC2.MYB28*<sup>G120</sup>-transgenic T<sub>1</sub> lines.**

| Transgenic line | Mean ± SD  |            | No. of plants |          | <i>P</i> -Value <sup>a</sup> |
|-----------------|------------|------------|---------------|----------|------------------------------|
|                 | Negative   | Positive   | Negative      | Positive |                              |
| ZG-4            | 17.5 ± 1.8 | 24.6 ± 2.1 | 14            | 28       | 9.07E-14                     |
| ZG-8            | 18.3 ± 2.1 | 23.2 ± 1.7 | 11            | 35       | 9.35E-10                     |
| ZG-13           | 18.9 ± 2.5 | 25.3 ± 2.7 | 10            | 29       | 1.01E-07                     |

Data are shown as mean ± SD ( $n \geq 10$ ). *P* values were generated by a two-tailed Student's *t*-test. SD, standard deviation.

<sup>a</sup> indicates the *P* value calculated between negative and positive plants.

**Table S2. SGC in *BnaC2.MYB28*-CRISPR T<sub>2</sub> lines.**

| Transgenic line | Mean ± SD  | No. of plants | <i>P</i> -Value <sup>a</sup> |
|-----------------|------------|---------------|------------------------------|
| G120            | 32.5 ± 2.7 | 28            |                              |
| GCR-52-2        | 23.9 ± 3.2 | 26            | 8.51E-15                     |
| GCR-52-3        | 21.7 ± 2.5 | 39            | 1.70E-25                     |
| GCR-52-6        | 24.1 ± 3.3 | 43            | 3.51E-17                     |
| GCR-403-16      | 14.1 ± 2.4 | 32            | 1.84E-35                     |
| GCR-403-17      | 16.5 ± 2.0 | 40            | 1.08E-38                     |
| GCR-403-35      | 15.6 ± 2.4 | 43            | 2.94E-39                     |

Data are shown as mean ± SD ( $n \geq 26$ ). *P* values were generated by a two-tailed Student's *t*-test. SD, standard deviation

<sup>a</sup> indicates the *P* value calculated between transgenic lines and G120 plants.

**Table S3. SGC in *BnaC2.MYB28*<sup>ZY50</sup>-transgenic T<sub>1</sub> lines.**

| Transgenic line | Mean ± SD  |            | No. of plants |          | <i>P</i> -Value <sup>a</sup> |
|-----------------|------------|------------|---------------|----------|------------------------------|
|                 | Negative   | Positive   | Negative      | Positive |                              |
| GZ-2            | 32.6 ± 1.4 | 40.6 ± 2.3 | 11            | 36       | 6.11E-14                     |
| GZ-5            | 30.7 ± 2.1 | 37.2 ± 2.1 | 13            | 27       | 2.38E-11                     |
| GZ-6            | 32.2 ± 2.3 | 44.3 ± 3.2 | 10            | 23       | 5.61E-12                     |

Data are shown as mean ± SD ( $n \geq 10$ ). *P* values were generated by a two-tailed Student's *t*-test. SD, standard deviation.

<sup>a</sup> indicates the *P* value calculated between negative and positive plants.

**Table S4. SGC in two p35S::*BnaC2.MYB28*<sup>ZY50</sup>-transgenic T<sub>1</sub> lines.**

| Transgenic line | Mean ± SD  |              | No. of plants |          | <i>P</i> -Value <sup>a</sup> |
|-----------------|------------|--------------|---------------|----------|------------------------------|
|                 | Negative   | Positive     | Negative      | Positive |                              |
| ZOE-22          | 22.3 ± 3.6 | 47.9 ± 20.0  | 9             | 6        | 0.002                        |
| ZOE-25          | 19.8 ± 1.1 | 161.3 ± 15.8 | 14            | 46       | 2.04E-39                     |

Data are shown as mean ± SD ( $n \geq 6$ ). *P* values were generated by a two-tailed Student's *t*-test. SD, standard deviation.

<sup>a</sup> indicates the *P* value calculated between negative and positive plants.

**Table S5. SGC in RNAi and overexpressing of *BnaC2.MYB28*<sup>G120</sup>-transgenic T<sub>0</sub> lines.**

| Transgenic line | Mean ± SD  |              | No. of plants |          | <i>P</i> -Value <sup>a</sup> |
|-----------------|------------|--------------|---------------|----------|------------------------------|
|                 | Negative   | Positive     | Negative      | Positive |                              |
| G120-RNAi       | 33.4 ± 3.1 | 23.7 ± 2.0   | 17            | 6        | 4.22E-07                     |
| G120-OE         | 32.3 ± 5.0 | 128.7 ± 35.9 | 40            | 16       | 4.09E-23                     |

Data are shown as mean ± SD ( $n \geq 6$ ). *P* values were generated by a two-tailed Student's *t*-test. SD, standard deviation.

<sup>a</sup> indicates the *P* value calculated between negative and positive plants.

**Table S6. Overlapping genes involved in GSL biosynthesis of ChIP-seq and RNA-seq.**

| Gene ID (ZS11)          | Gene name                   | <i>Arabidopsis</i> |  | Description                                                                                                                                                             |
|-------------------------|-----------------------------|--------------------|--|-------------------------------------------------------------------------------------------------------------------------------------------------------------------------|
|                         |                             | locus ID           |  |                                                                                                                                                                         |
| <i>BnaC03G0321400ZS</i> | <i>AOP1</i>                 | <i>AT4G03070</i>   |  | Encodes a possible 2-oxoglutarate-dependent dioxygenase that is involved in glucosinolate biosynthesis.                                                                 |
| <i>BnaA02G0257300ZS</i> | <i>AOP3</i>                 | <i>AT4G03050</i>   |  | Encodes a 2-oxoglutarate-dependent dioxygenase which is involved in glucosinolate biosynthesis.                                                                         |
| <i>BnaA03G0259200ZS</i> |                             |                    |  |                                                                                                                                                                         |
| <i>BnaA09G0244600ZS</i> |                             |                    |  |                                                                                                                                                                         |
| <i>BnaC03G0308400ZS</i> | <i>BAT5</i>                 | <i>AT4G12030</i>   |  | Involved in the transport of 2-keto acids between chloroplasts and the cytosol.                                                                                         |
| <i>BnaC03G0308500ZS</i> |                             |                    |  |                                                                                                                                                                         |
| <i>BnaC09G0288000ZS</i> |                             |                    |  |                                                                                                                                                                         |
| <i>BnaA03G0359600ZS</i> |                             |                    |  |                                                                                                                                                                         |
| <i>BnaA05G0362200ZS</i> | <i>BCAT4</i>                | <i>AT3G19710</i>   |  | Involved in the methionine chain elongation pathway that leads to the ultimate biosynthesis of methionine-derived glucosinolates.                                       |
| <i>BnaC03G0438900ZS</i> |                             |                    |  |                                                                                                                                                                         |
| <i>BnaC05G0396400ZS</i> |                             |                    |  |                                                                                                                                                                         |
| <i>BnaA08G0192100ZS</i> | <i>CYP79B1</i>              | <i>AT4G39950</i>   |  | Belongs to cytochrome P450 and is involved in tryptophan metabolism.                                                                                                    |
| <i>BnaA04G0074700ZS</i> |                             |                    |  |                                                                                                                                                                         |
| <i>BnaC04G0359300ZS</i> | <i>CYP83A1</i>              | <i>AT4G13770</i>   |  | Encodes a cytochrome p450 enzyme that catalyzes the initial conversion of aldoximes to thiohydroximates in the synthesis of glucosinolates not derived from tryptophan. |
| <i>BnaA09G0155300ZS</i> |                             |                    |  |                                                                                                                                                                         |
| <i>BnaC09G0170500ZS</i> | <i>FMO<sub>GS-OX1</sub></i> | <i>AT1G65860</i>   |  | Belongs to the flavin-monooxygenase (FMO) family.                                                                                                                       |
| <i>BnaA09G0155200ZS</i> | <i>FMO<sub>GS-OX2</sub></i> | <i>AT1G62540</i>   |  | Belongs to the flavin-monooxygenase (FMO) family.                                                                                                                       |
| <i>BnaC03G0090500ZS</i> | <i>GS-OH</i>                | <i>AT2G25450</i>   |  | Encodes a 2-oxoacid-dependent dioxygenase involved in the production of 2-hydroxybut-3-enyl glucosinolate.                                                              |
| <i>BnaA02G0052200ZS</i> |                             |                    |  |                                                                                                                                                                         |
| <i>BnaC02G0060000ZS</i> | <i>IPMDH1</i>               | <i>AT5G14200</i>   |  | Involved in glucosinolate biosynthesis, in methionine chain elongation.                                                                                                 |
| <i>BnaA05G0036500ZS</i> | <i>IPMI2</i>                | <i>AT2G43100</i>   |  | Together with IPMI SSU3 participates in the Met chain elongation pathway.                                                                                               |
| <i>BnaA06G0128100ZS</i> |                             |                    |  |                                                                                                                                                                         |
| <i>BnaC05G0156200ZS</i> | <i>SOT17</i>                | <i>AT1G18590</i>   |  | Encodes a desulfoglucosinolate sulfotransferase, involved in the final step of glucosinolate core structure biosynthesis.                                               |
| <i>BnaC06G0404300ZS</i> | <i>SOT18</i>                | <i>AT1G74090</i>   |  | Encodes a desulfoglucosinolate sulfotransferase, involved in the final step of glucosinolate core structure biosynthesis.                                               |
| <i>BnaA07G0001300ZS</i> |                             |                    |  |                                                                                                                                                                         |
| <i>BnaC07G0005900ZS</i> | <i>SUR1</i>                 | <i>AT2G20610</i>   |  | Encodes a C-S lyase involved in converting S-alkylthiohydroximate to thiohydroximate in glucosinolate biosynthesis.                                                     |
| <i>BnaA09G0448300ZS</i> |                             |                    |  |                                                                                                                                                                         |
| <i>BnaC05G0210800ZS</i> | <i>UTG74B1</i>              | <i>AT1G24100</i>   |  | Encodes a UDP-glucose: thiohydroximate S-glucosyltransferase, involved in glucosinolate biosynthesis.                                                                   |

**Table S7. Summary of primers used in this study.**

| Primer name    | Sequence 5'-3'                                 | Purpose                                                        |
|----------------|------------------------------------------------|----------------------------------------------------------------|
| SSA2-102F      | AGCAAAAGCACCTCATTAGC                           | Fine mapping (co-segregation marker of <i>qGSL-C2</i> )        |
| SSA2-102R      | TCCCAGCGTGAATTGAACCTA                          |                                                                |
| SSA2-146F      | GGTTAATCCACCATGATGTC                           | Fine mapping (flanking marker of <i>qGSL-C2</i> )              |
| SSA2-146R      | GCTAAGATTGTTAGAGCGTTCC                         |                                                                |
| SSA2-157F      | ACTCTCTAGCCACCAAGTCCA                          | Fine mapping (flanking marker of <i>qGSL-C2</i> )              |
| SSA2-157R      | ACACCGAAAACTTGCGACTGCT                         |                                                                |
| G120-pM999F    | GGAGAGGACAGGGTACCCGGGATGTCAAGAAAGCCATGTTGT     | <i>BnaC2.MYB28</i> <sup>G120</sup> -GFP construction           |
| G120-pM999R    | GGCAGCGGCAGCAGCCGGATCCTATGAAATCATAGTCCGTGTCA   |                                                                |
| ZY50-pM999F    | GGAGAGGACAGGGTACCCGGGATGTCAAGAAAGCCATGTTGT     | <i>BnaC2.MYB28</i> <sup>ZY50</sup> -GFP construction           |
| ZY50-pM999R    | GGCAGCGGCAGCAGCCGGATCCTATGATTTGCTTATCGAAGAAATC |                                                                |
| qBCAT4-F       | GGATAACATTAGCAGAGGCGA                          | RT-qPCR analysis of <i>BnaBCAT4</i> expression                 |
| qBCAT4-R       | TTCCTCAACCTTGTAGCCGA                           |                                                                |
| qIPMDH1-F      | TTCCATCTGCTAGTCTCGGT                           | RT-qPCR analysis of <i>BnaIPMDH1</i> expression                |
| qIPMDH1-R      | CATCCCACCAGTTTATTTCCAG                         |                                                                |
| qCYP79F1-F     | ATTCATTCCCAAAGGTAGCCAC                         | RT-qPCR analysis of <i>BnaCYP79F1</i> expression               |
| qCYP79F1-R     | AGAAAGCTCCTTCGAGATTCC                          |                                                                |
| qCYP83A1-F     | AGATCAACCTTTCGCCTCCAAG                         | RT-qPCR analysis of <i>BnaCYP83A1</i> expression               |
| qCYP83A1-R     | ACTTCATCAAATACGTCAATCCCCA                      |                                                                |
| qBnACTIN7-L    | CCCTGGAATTGCTGACCGTA                           | RT-qPCR control for <i>B. napus</i>                            |
| qBnACTIN7-R    | TGGAAAGTGCTGAGGGATGC                           |                                                                |
| qBnaC2.MYB28-F | CATCATGCTCCATGCTGCTC                           | RT-qPCR analysis of <i>BnaC2.MYB28</i> expression              |
| qBnaC2.MYB28-R | AGAAGCTAGTGGCTTGTGAGTCAC                       |                                                                |
| G120- DT1-BsF  | ATATATGGTCTCGATTGGTGTGGTGTATCTCGGAAACGTT       | CRISPR/Cas9 construction of <i>BnaC2.MYB28</i> <sup>G120</sup> |
| G120-F0        | TGGTGTGGTGTATCTCGGAAACGTTTTAGAGCTAGAAATAGC     |                                                                |

|              |                                                  |                                                                 |
|--------------|--------------------------------------------------|-----------------------------------------------------------------|
| G120-DT2-R0  | AACGCCCTCGAAGTTTCCTATCCAATCTCTTAGTCGACTCTAC      | CRISPR/Cas9 construction of <i>BnaC2.MYB28<sup>G120</sup></i>   |
| G120-DT2-BsR | ATTATTGGTCTCGAAACGCCCTCGAAGTTTCCTATCCAA          |                                                                 |
| LUC-ZY50F    | CTATAGGGCGAATTGGGTACCATATGTGAGGGGTGGTAAGAGACG    | Promoter activity analysis of <i>BnaC2.MYB28<sup>ZY50</sup></i> |
| LUC-ZY50R    | CGCTCTAGAACTAGTGGATCCTTTCTCCGATATATATATATGAACAC  |                                                                 |
| LUC-G120F    | CTATAGGGCGAATTGGGTACCCCGGATATCCATAAACCTTCG       | Promoter activity analysis of <i>BnaC2.MYB28<sup>G120</sup></i> |
| LUC-G120R    | CGCTCTAGAACTAGTGGATCCTTTCTCCGATATATATAGATGAAC    |                                                                 |
| 35S-G120F    | CAGGTCGACTCTAGAGGATCCATGTCAAGAAAGCCATGTTGTGT     | 35S:: <i>BnaC2.MYB28<sup>G120</sup></i> construction            |
| 35S-G120R    | CGAGAATTCGAGCTCGGTACCTCATATGAAATCATAGTCCGTGTCA   |                                                                 |
| 35S-ZY50F    | CAGGTCGACTCTAGAGGATCCATGTCAAGAAAGCCATGTTGTGT     | 35S:: <i>BnaC2.MYB28<sup>ZY50</sup></i> construction            |
| 35S-ZY50R    | CGAGAATTCGAGCTCGGTACCTCATATGATTTGCTTATCGAAGAAATC |                                                                 |
| HB-G120F     | TATGACCATGATTACGAATTCCTCCGGATATCCATAAACCTTCGAAG  | Functional analysis for <i>BnaC2.MYB28<sup>G120</sup></i>       |
| HB-G120R     | CAGGTCGACTCTAGAGGATCCGACGATAAGAACCTTTGCGAGATC    |                                                                 |
| HB-ZY50F     | TATGACCATGATTACGAATTCATATGTGAGGGGTGGTAAGAGACG    | Functional analysis for <i>BnaC2.MYB28<sup>ZY50</sup></i>       |
| HB-ZY50R     | CAGGTCGACTCTAGAGGATCCCGGCTCACACTCCGATTATCTG      |                                                                 |
| MR-G120F1    | TTACAATTACCATGGGGCGCGCCCAATGGCTTCCCTGAG          | RNAi construction of <i>BnaC2.MYB28<sup>G120</sup></i>          |
| MR-G120R1    | AAGAAATTCTTACACATTTAAATTACTCGACATTCGTATTGTGC     |                                                                 |
| MR-G120F2    | AATTTGCAGGTATTTGGATCCTACTCGACATTCGTATTGTGC       | RNAi construction of <i>BnaC2.MYB28<sup>G120</sup></i>          |
| MR-G120R2    | ACTCTAGGGACTAGTCCCGGGCCAATGGCTTCCCTGAG           |                                                                 |
| CR-gF1       | CATGTCTCTCCTCTTTCT                               | Detection primer of target 1 for CRISPR construction            |
| CR-gR1       | AGCCTTGATGTAGAGCTCGA                             |                                                                 |
| CR-gF2       | CTAGATGCATCTAGTTCCGA                             | Detection primer of target 2 for CRISPR construction            |
| CR-gR2       | AACCTCTCTGAACTGGTGTG                             |                                                                 |

---
